# Supplementary material
Source: Springer Nature journal article supplement (https://www.springermedizin.de/resource/supplementary/12885_2009_2075_MOESM3_ESM.pdf/9460454)

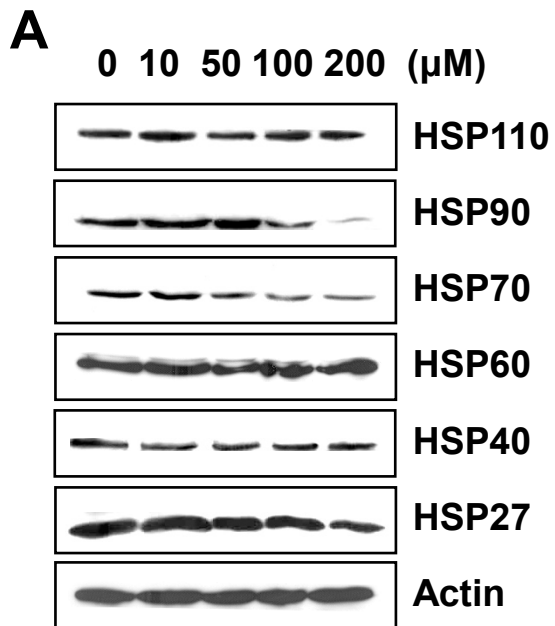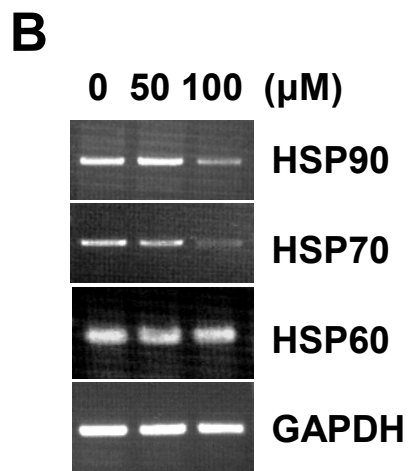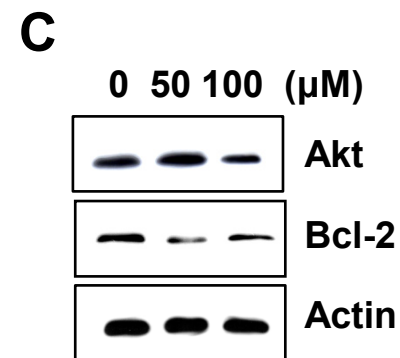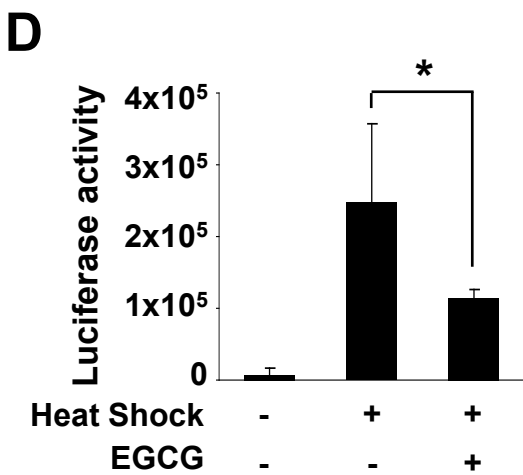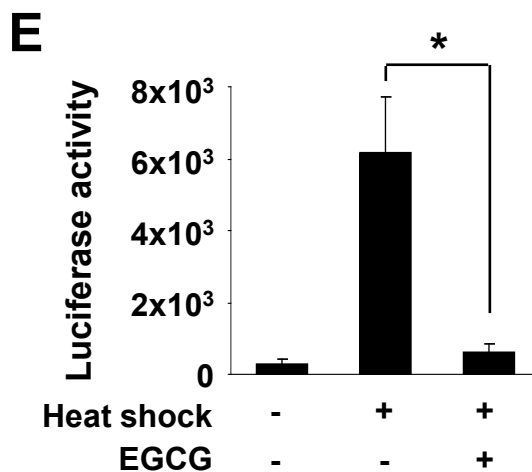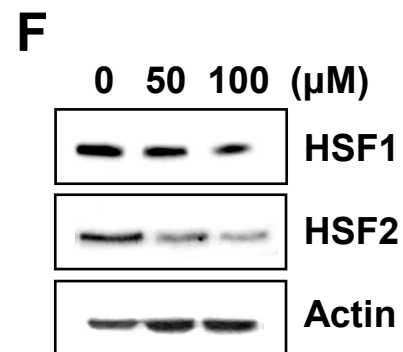

Supplement: MOESM3 [file 9460454]
